# Supplementary material for: A model of human neural networks reveals NPTX2 pathology in ALS and FTLD
Source: PubMed Central journal article supplement (PMC10901740; doi:10.1038/s41586-024-07042-7), 2024-02-14
Supplement: 41586_2024_7042_MOESM1_ESM.pdf [file 41586_2024_7042_MOESM1_ESM.pdf]

**Supplementary information**

---

**A model of human neural networks reveals  
NPTX2 pathology in ALS and FTLD**

---

In the format provided by the  
authors and unedited

## SI Guide to

### ***A model of human neural networks reveals NPTX2 pathology in ALS/FTLD***

Marian Hruska-Plochan<sup>1</sup>, Vera I. Wiersma<sup>1,13</sup>, Katharina M. Betz<sup>1,2,3,13</sup>, Izaskun Mallona<sup>1,2,3,13</sup>, Silvia Ronchi<sup>4,12,13</sup>, Zuzanna Maniecka<sup>1</sup>, Eva-Maria Hock<sup>1</sup>, Elena Tantardini<sup>1</sup>, Florent Laferriere<sup>1</sup>, Sonu Sahadevan<sup>1</sup>, Vanessa Hoop<sup>2</sup>, Igor Delvendahl<sup>2</sup>, Manuela Pérez-Berlanga<sup>1</sup>, Beatrice Gatta<sup>1</sup>, Martina Panatta<sup>1</sup>, Alexander van der Bourg<sup>5</sup>, Dasa Bohaciakova<sup>6</sup>, Puneet Sharma<sup>7,8</sup>, Laura De Vos<sup>1</sup>, Karl Frontzek<sup>9</sup>, Adriano Aguzzi<sup>9</sup>, Tammarny Lashley<sup>10,11</sup>, Mark D. Robinson<sup>2,3</sup>, Theofanis Karayannis<sup>5</sup>, Martin Mueller<sup>2</sup>, Andreas Hierlemann<sup>4</sup> & Magdalini Polymenidou<sup>1#</sup>

### **Table of contents**

- **Supplementary Figure 1 Cluster markers and known marker genes of iCoMoNSCs** (*this PDF*)  
**a**, Heatmap showing top cluster markers of iCoMoNSCs clusters. **b**, Heatmap showing gene expression of a set of known markers amongst the iCoMoNSCs clusters. **c**, UMAP of iCoMoNSCs integrated with cells from three human NSC lines showing individual samples in different colors.
- **Supplementary Figure 2 Neuronal and glial maturation of iNets** (*this PDF*)  
**a**, UMAP of iCoMoNSCs and young, middle and old iNets (in replicates) showing cells from individual samples (different wells from the same differentiation) in different colors. **b**, Heatmap of cell distribution from all experimental stages amongst all clusters. **c**, Top marker genes for each cluster. **d**, UMAP with normalized expression of selected NSC, **(e)** glial, **(f)** pericyte and **(g)** neuronal marker genes across all samples. **h**, Heatmap with the expression of the top cluster markers from **(c)** from our aging experiment.
- **Supplementary Figure 3 Neuronal and glial maturation of iNets** (*this PDF*)  
Heatmap with the gene expression of known marker genes amongst all clusters from our aging experiment.
- **Supplementary Figure 4 and 5 Uncropped western blots** (*this PDF*)  
Compilation of all raw data obtained by electrophoretic separation.
- **Supplementary Table 1 DEG Cluster 12 vs other neuronal clusters upregulated (scRNA-seq)** (*separate Excel file*)  
Genes identified by scRNA-seq as cluster 12 markers that are upregulated upon TDP-43-HA overexpression in iNets compared to other neuronal clusters.
- **Supplementary Table 2 DEG Cluster 12 vs other neuronal clusters downregulated (scRNA-seq)** (*separate Excel file*)  
Genes identified by scRNA-seq as cluster 12 markers that are downregulated upon TDP-43-HA overexpression in iNets compared to other neuronal clusters.
- **Supplementary Table 3 DEG Cluster 12 in TDP-43-negative FTLN-ALS patient nuclei** (*separate Excel file*)

Differential expression status of top up- and downregulated genes in cluster 12 in TDP-43-negative nuclei in FTLD-ALS patient brains.

- **Supplementary Table 4 DEG TDP-43-HA ON vs OFF (bulk)** (*separate Excel file*)  
Differentially expressed genes identified by bulk RNA-seq of iNets overexpressing TDP-43-HA (ON) compared to transduced iNets lacking expression induction (OFF).
- **Supplementary Table 5 DEG TDP-43 KD vs Ctrl shRNA (bulk)** (*separate Excel file*)  
Differentially expressed genes identified by bulk RNA-seq of iNets with shRNA-mediated TDP-43 KD compared to control shRNA-treated iNets.
- **Supplementary Table 6 Spliced exons** (*separate Excel file*)  
Analysis of spliced exon events in iNets with TDP-43 KD and TDP-43-HA overexpression.
- **Supplementary Table 7 Shared genes (OE, KD, patient brain) downregulated** (*separate Excel file*)  
Genes downregulated upon TDP-43-HA overexpression (ON) in iNets, shRNA-mediated TDP-43 KD in iNets and in TDP-43-negative neurons in FTLD-ALS patient brains.
- **Supplementary Table 8 Shared genes (OE, KD, patient brain) upregulated** (*separate Excel file*)  
Genes upregulated upon TDP-43-HA overexpression (ON) in iNets, shRNA-mediated TDP-43 KD in iNets and in TDP-43-negative neurons in FTLD-ALS patient brains.
- **Supplementary Table 9 Demographics of cases used in the present study** (*this PDF*)  
Overview of demographic data on human subjects of which post-mortem brain tissue was used in the present study
- **Supplementary Table 10 Antibody list** (*this PDF*)  
Overview of primary and secondary antibodies used in the present study.
- **Supplementary Table 11 Primer and shRNA hairpin sequences** (*this PDF*)  
PCR primers for Q5 polymerase site-directed mutagenesis cloning of shRNAs into MHP\_shRNA cassette and resulting shRNA hairpin sequences.

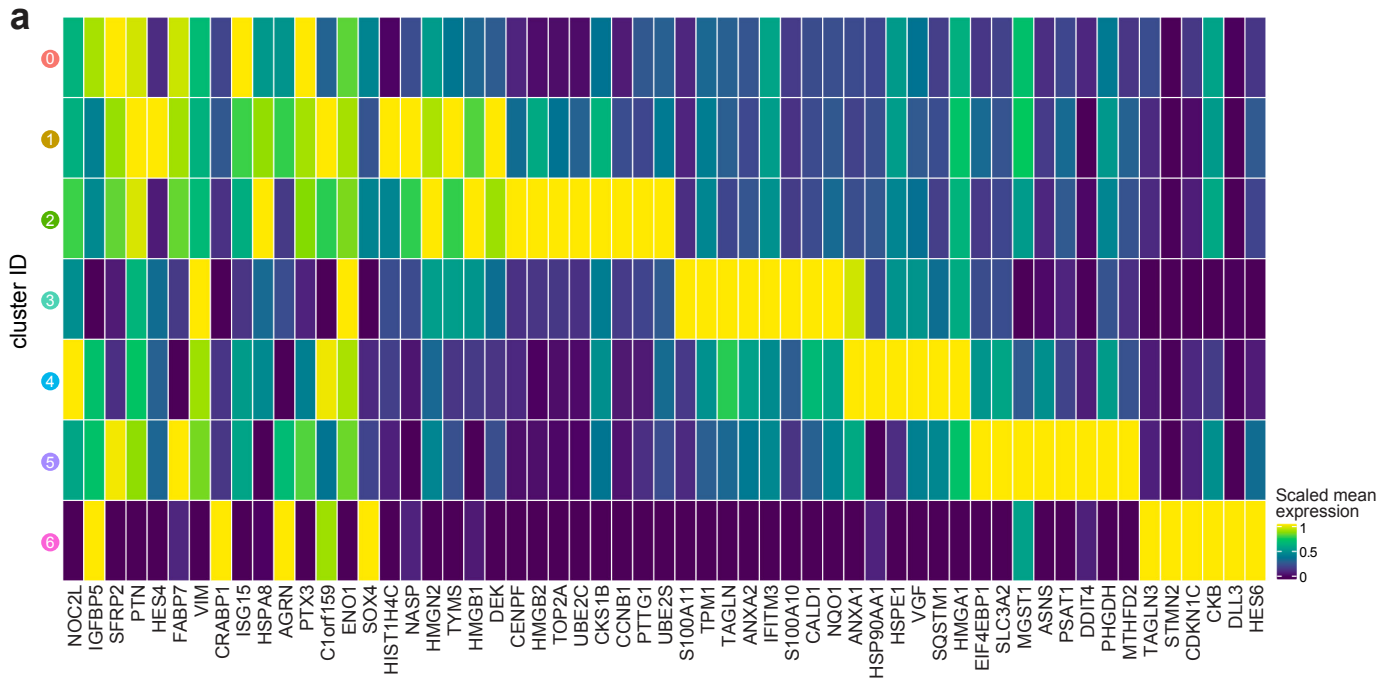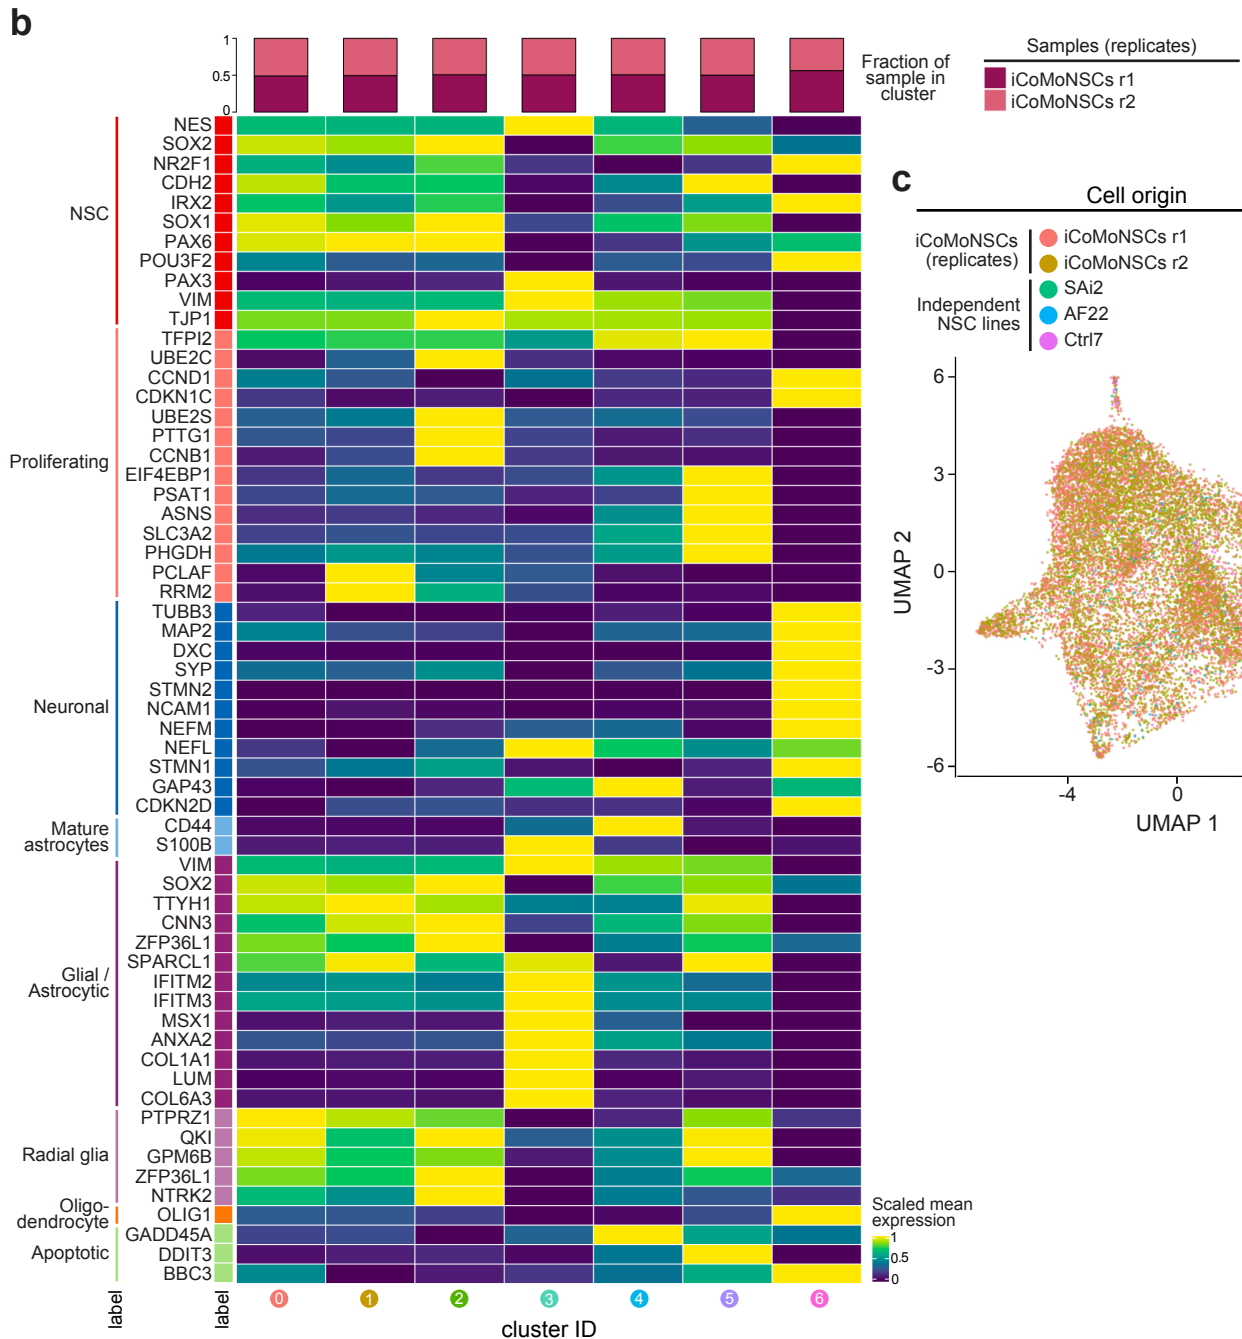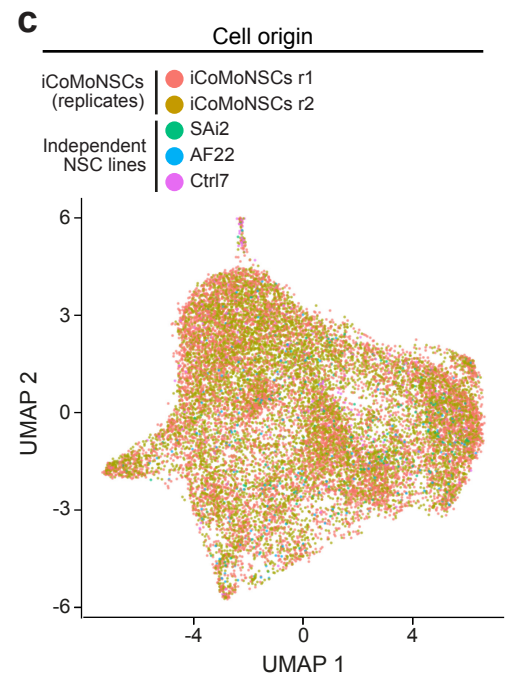

Supplementary Fig. 1



**Supplementary Figure 1 Cluster markers and known marker genes of iCoMoNSCs.** **a**, Heatmap showing top cluster markers of iCoMoNSCs clusters. **b**, Heatmap showing gene expression of a set of known markers amongst the iCoMoNSCs clusters. **c**, UMAP of iCoMoNSCs integrated with cells from three human NSC lines showing individual samples in different colors.

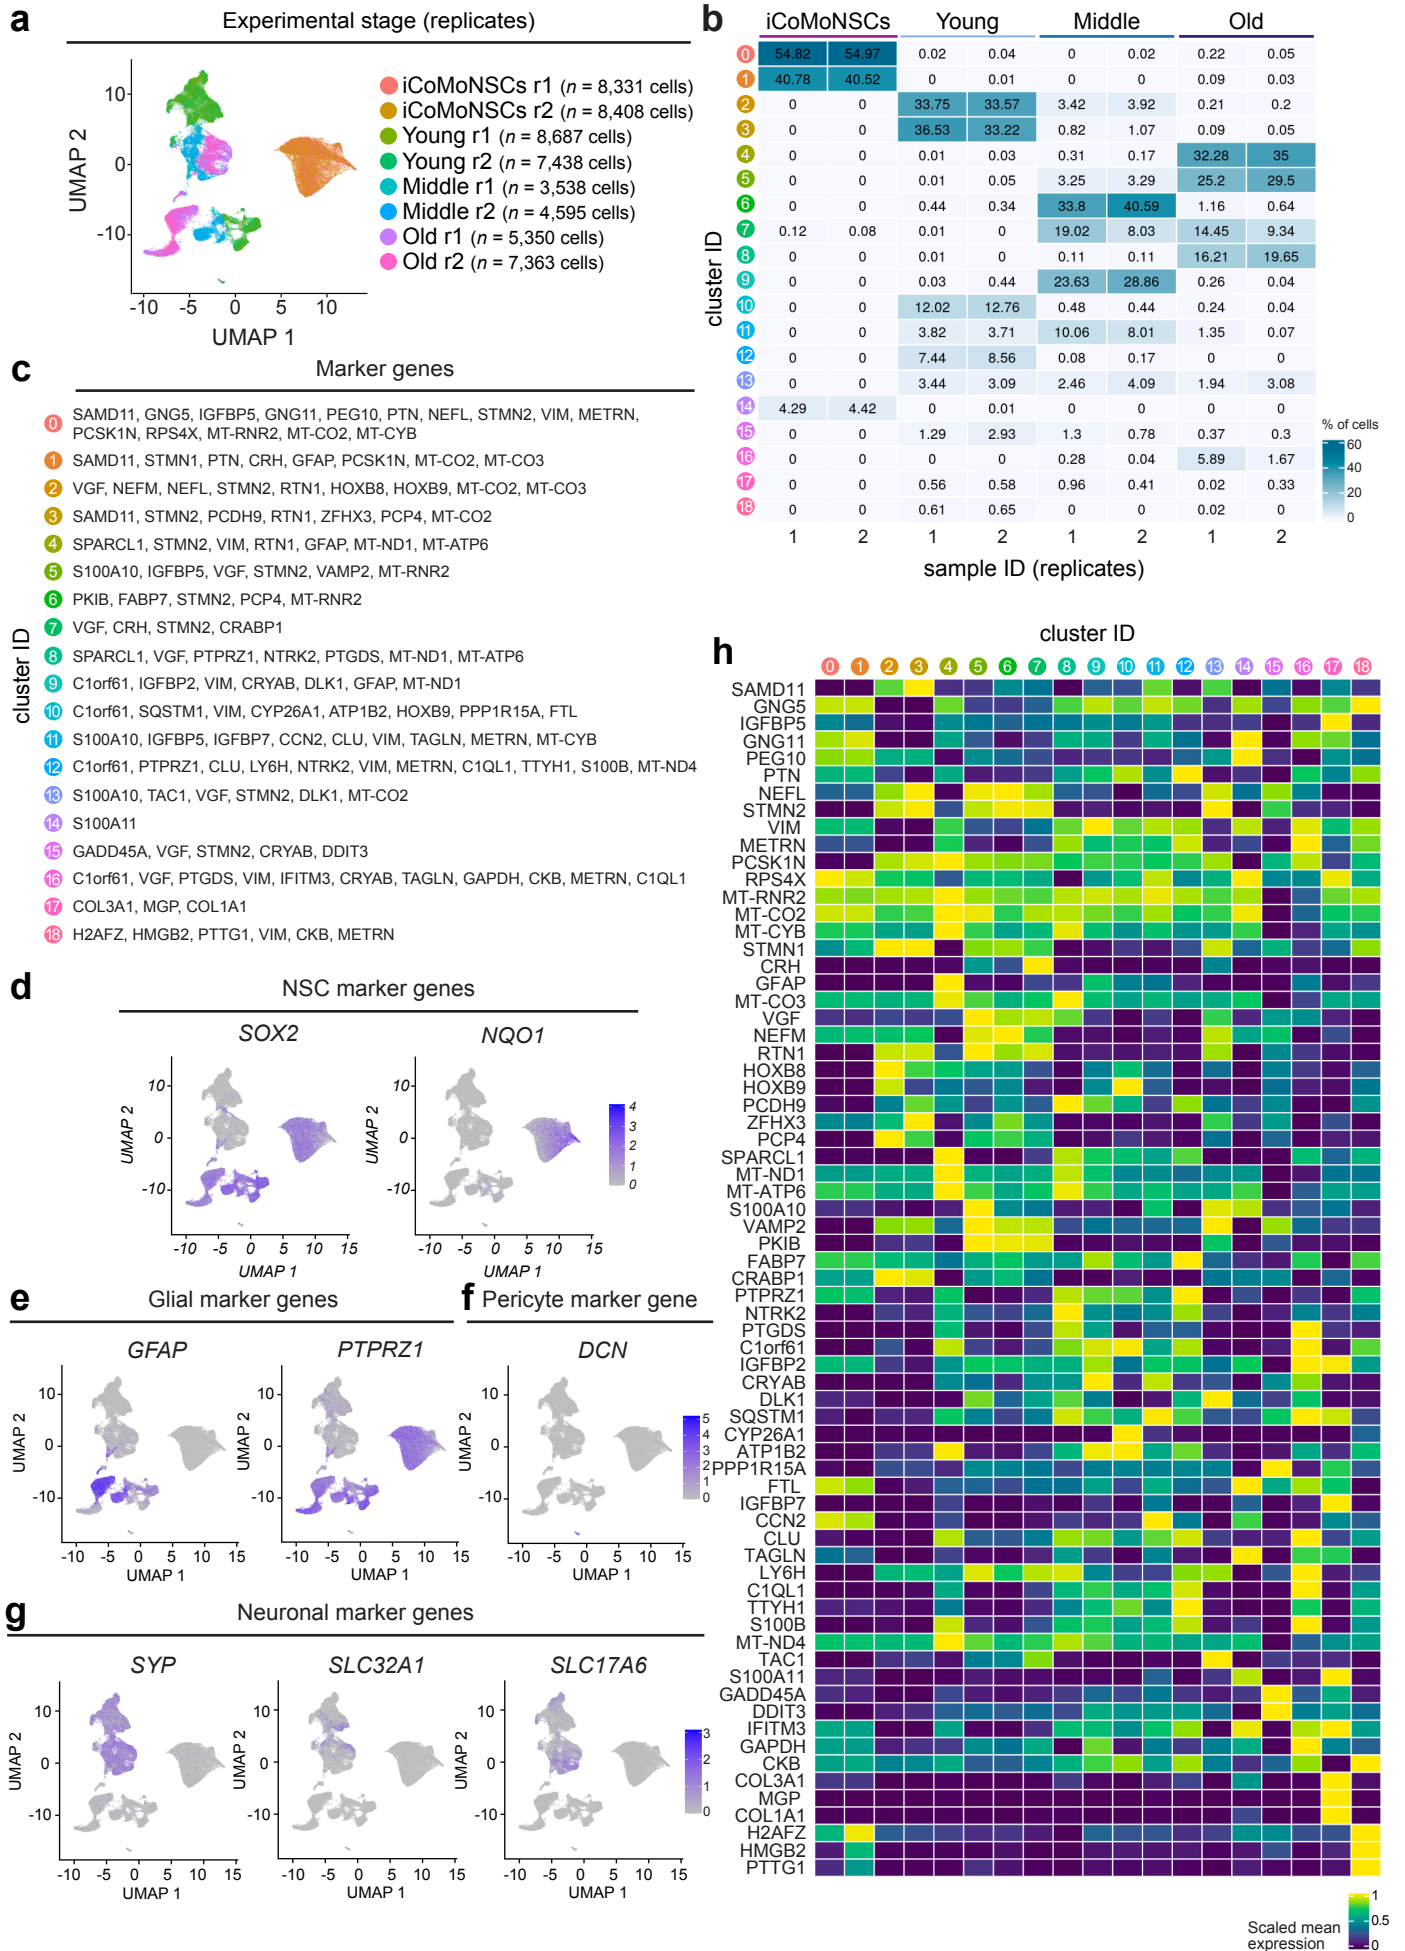

Supplementary Fig. 2

**Supplementary Figure 2 Neuronal and glial maturation of iNets** **a**, UMAP of iCoMoNSCs and young, middle and old iNets (in replicates) showing cells from individual samples (different wells from the same differentiation) in different colors. **b**, Heatmap of cell distribution from all experimental stages amongst all clusters. **c**, Top marker genes for each cluster. **d**, UMAP with normalized expression of selected NSC, **(e)** glial, **(f)** pericyte and **(g)** neuronal marker genes across all samples. **h**, Heatmap with the expression of the top cluster markers from **(c)** from our aging experiment.

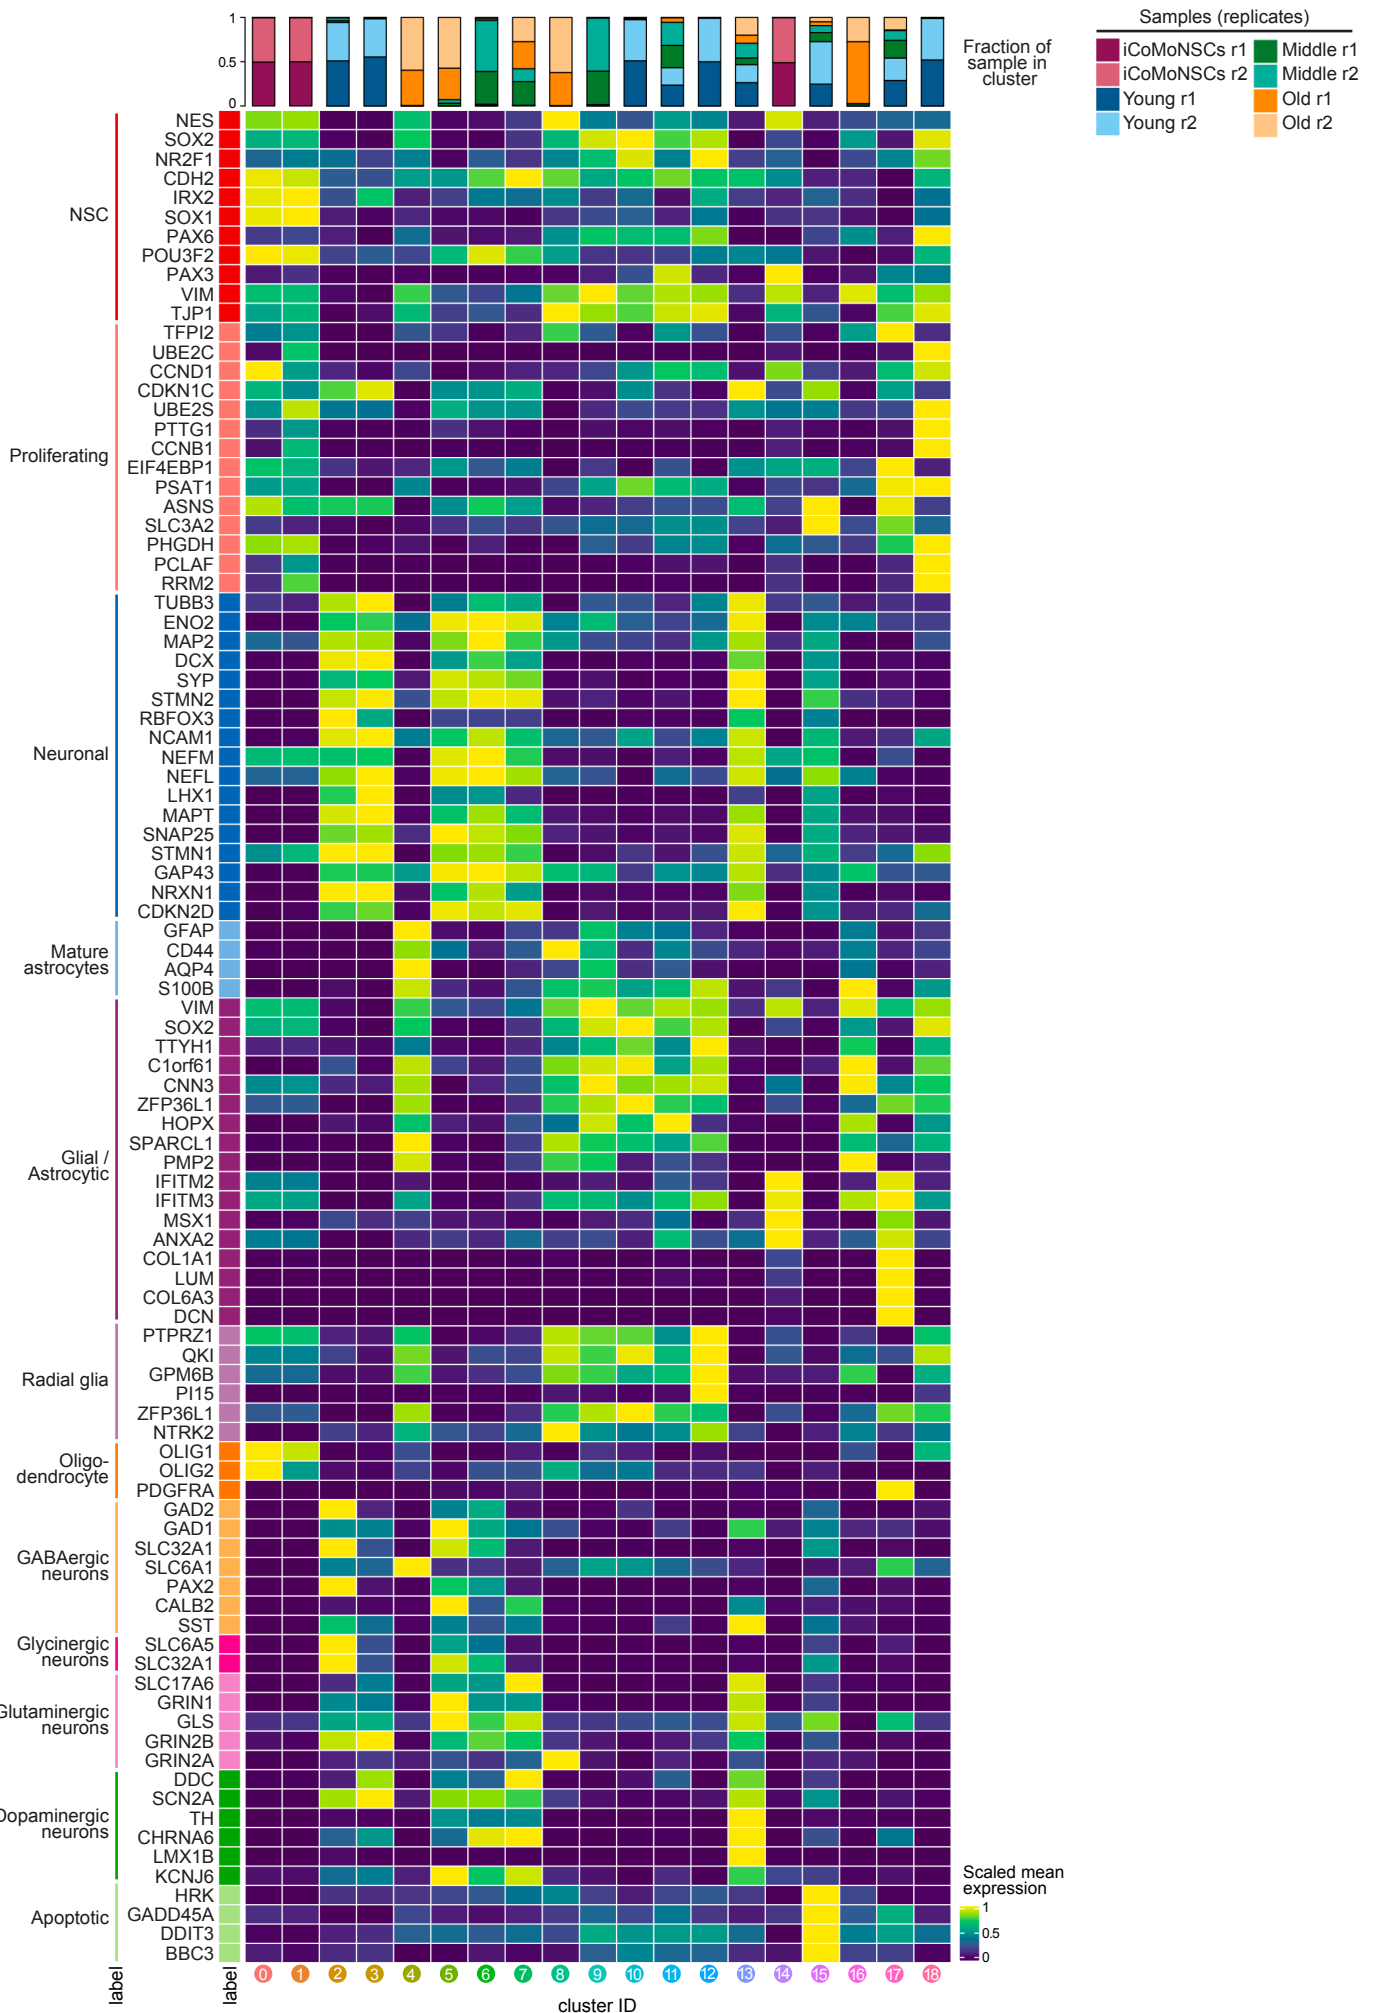

Supplementary Fig. 3

**Supplementary Figure 3 Heatmap with the gene expression of known marker genes amongst all clusters from our aging experiment.**

**a** Related to Figure 1j

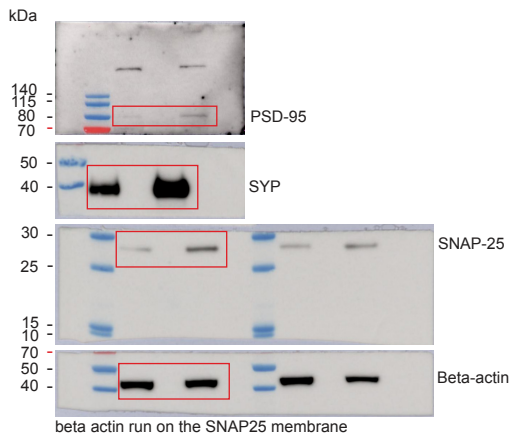

**b** Related to Figure 3c

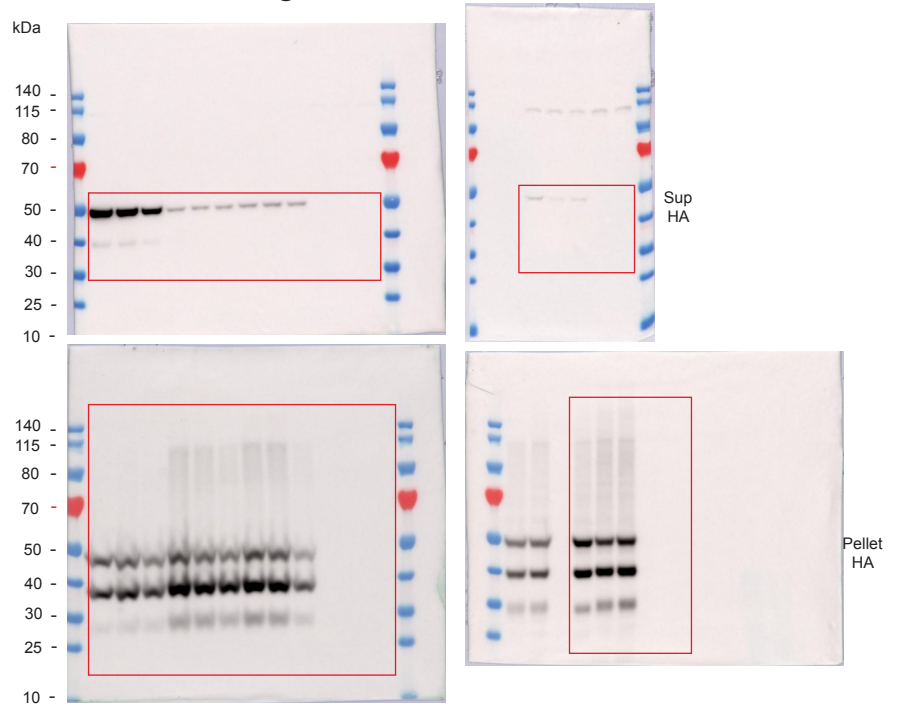

**c** Related to Extended data Figure 5 c and e

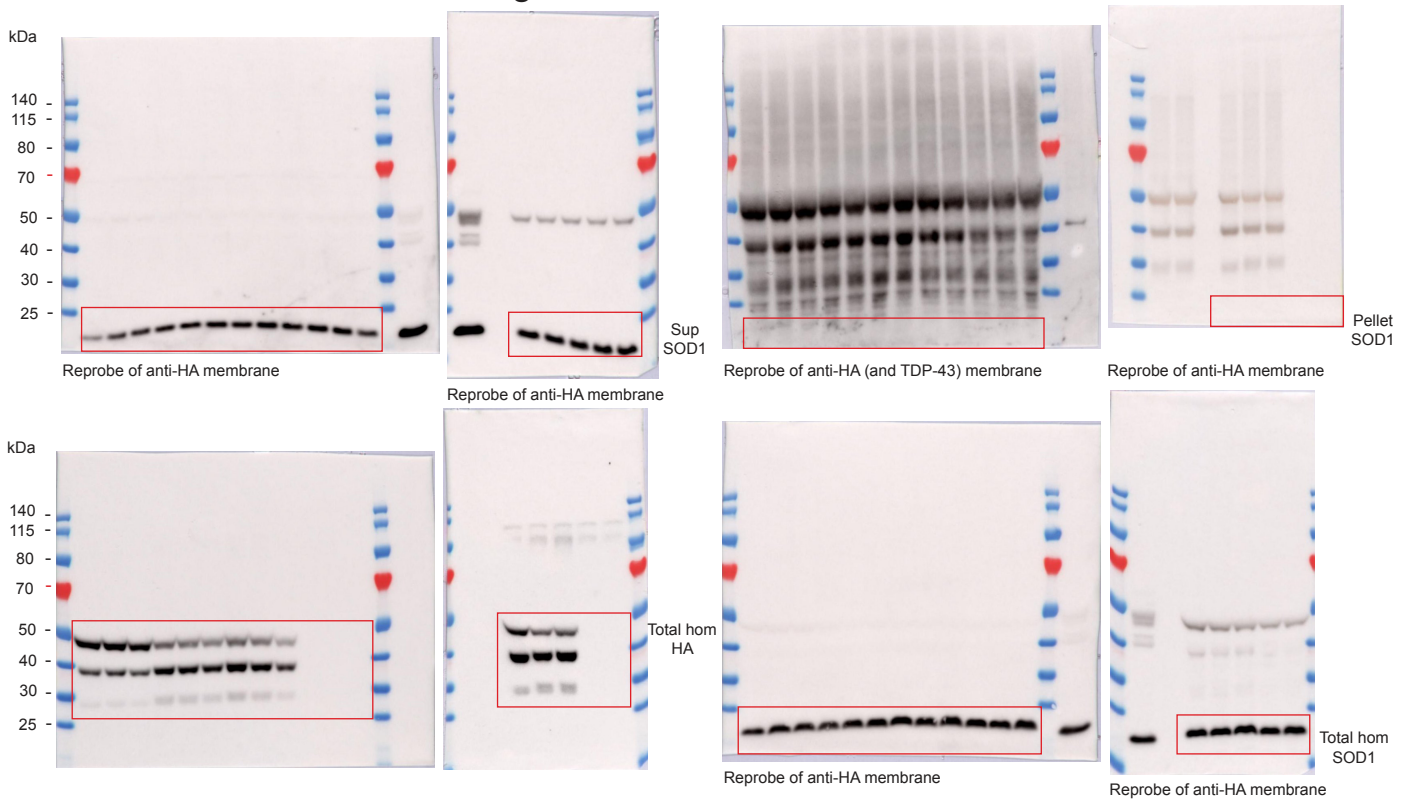

**Supplementary Figure 4 Uncropped western blots.** Compilation of raw data obtained by electrophoretic separation.

**a** Related to Extended data Figure 7 c

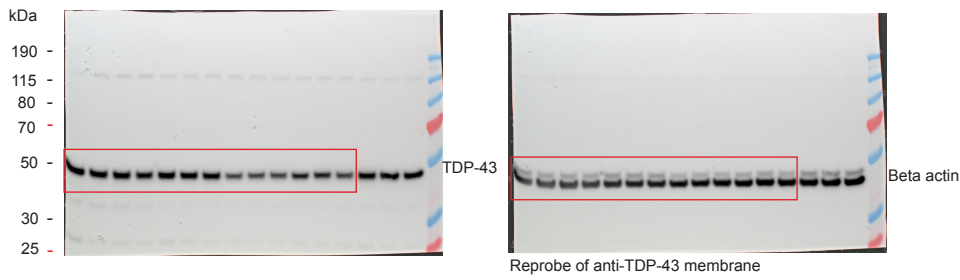

**b** Related to Extended data Figure 8 c

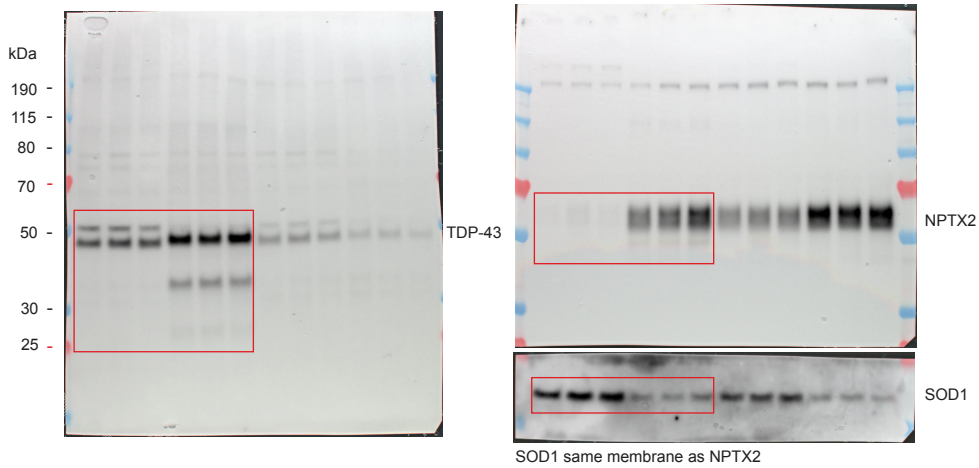

**c** Related to Extended data Figure 13 c

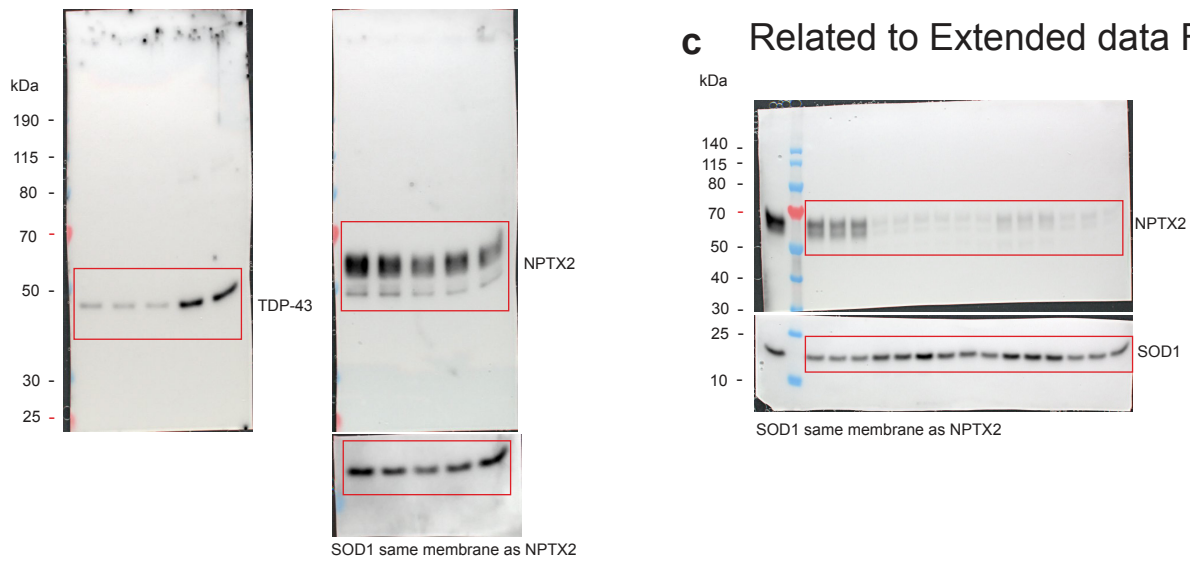

**d** Related to Extended data Figure 13 e

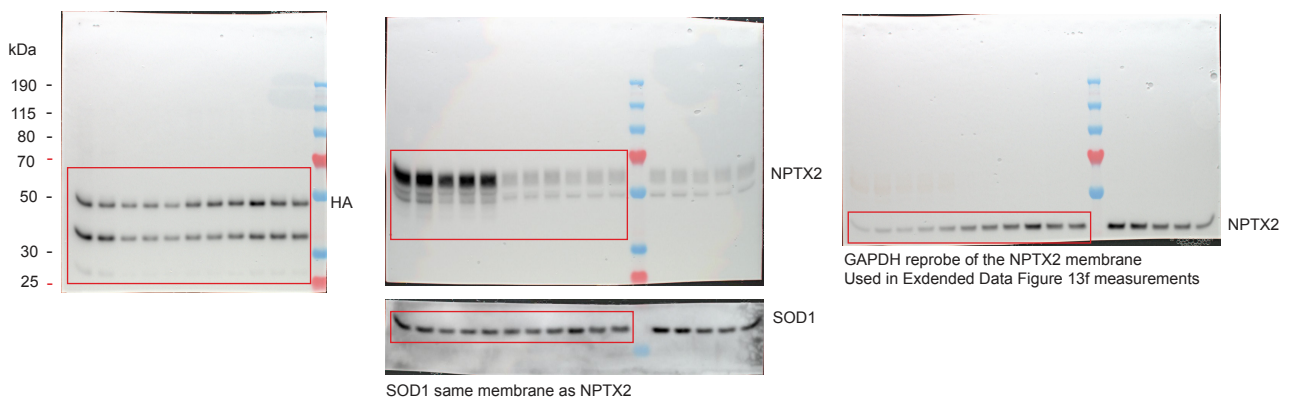



**Supplementary Figure 5 Uncropped western blots.** Compilation of raw data obtained by electrophoretic separation.

**Supplementary Table 9 Demographics of cases used in the present study**

| Cases | Neuropathological diagnosis | Mutation   | Gender | Age at disease onset | Age at death | Disease duration (years) | Post-mortem delay (h:min) |
|-------|-----------------------------|------------|--------|----------------------|--------------|--------------------------|---------------------------|
| 1     | FTLD-TDP, Type A            |            | F      | 57                   | 63           | 6                        | 85:20                     |
| 2     | FTLD-TDP, Type A            | C9orf72    | M      | 51                   | 61           | 10                       | 35:15                     |
| 3     | FTLD-TDP, Type A            | C9orf72    | F      | 56                   | 67           | 11                       | 85:35                     |
| 4     | FTLD-TDP, Type A            |            | M      | 59                   | 70           | 11                       | 44:05                     |
| 5     | FTLD-TDP, Type C            |            | M      | 64                   | 74           | 10                       | 19:00                     |
| 6     | FTLD-TDP, Type C            |            | M      | 71                   | 76           | 5                        | 39:30                     |
| 7     | FTLD-TDP, Type C            |            | F      | 58                   | 73           | 15                       | 37:55                     |
| 8     | ALS                         |            | F      | 62                   | 62           | 0.58                     | 46:00                     |
| 9     | FTLD-FUS                    |            | M      | 44                   | 46           | 2                        | 96:00                     |
| 10    | FTLD-FUS                    |            | M      | 49                   | 59           | 10                       | 81:35                     |
| 11    | FTLD-FUS                    |            | M      | n.a.                 | 67           | n.a.                     | 33:05                     |
| 12    | FTLD-Tau                    | MAPT 10+16 | M      | 59                   | 66           | 7                        | 58:10                     |
| 13    | FTLD-Tau                    | MAPT 10+16 | M      | 45                   | 51           | 6                        | 52:35                     |
| 14    | FTLD-Tau                    | MAPT L284R | M      | 41                   | 45           | 4                        | 27:55                     |
| 15    | FTLD-Tau                    | MAPT Q351R | F      | 36                   | 69           | 33                       | 82:55                     |
| 16    | AD                          |            | F      | 46                   | 61           | 15                       | 47:25                     |
| 17    | AD                          |            | M      | 54                   | 65           | 11                       | 34:25                     |
| 18    | AD                          |            | M      | 48                   | 63           | 15                       | 31:42                     |
| 19    | AD *                        |            | M      | 76                   | 82           | 6                        | 24:00                     |
| 20    | AD *                        |            | F      | 59                   | 79           | 20                       | 30:25                     |

AD Alzheimer's disease, ALS amyotrophic lateral sclerosis, C9orf72 Chromosome 9 open reading frame 72, F female, FTLD-FUS frontotemporal lobar degeneration with FUS proteinopathy, FTLD-Tau frontotemporal lobar degeneration with tauopathy, FTLD-TDP frontotemporal lobar degeneration with TDP-43 proteinopathy, h:min hours:minutes, M male, MAPT microtubule associated protein tau, n.a. not available, \* TDP-43 co-pathology

## Supplementary Table 10 Antibody list

### Primary antibodies

| Name    | Species, Source                           | WB dilution | Cell IF dilution | Brain IF dilution |
|---------|-------------------------------------------|-------------|------------------|-------------------|
| AQP4    | Rb, Novus Biologicals #NBP1-87679         | -           | 1:200            | -                 |
| DCX     | Gt, Santa Cruz Biotechnology #sc-8066 DCX | -           | 1:2000           | -                 |
| FUS     | Ms, ProteinTech #60160-1-Ig               | -           | -                | 1:50              |
| GFAP    | Gt, Abcam #ab53554                        | -           | 1:500            | -                 |
| HA      | Rb, Cell Signaling Technology #3724       | 1:2500      | 1:500            | -                 |
| HA      | Ms, Biolegend #901516                     | -           | 1:1000           | -                 |
| HA      | Ms, ThermoFisher #26183                   | -           | 1:500            | -                 |
| KI67    | Rb, Abcam #ab16667                        | -           | 1:250            | -                 |
| MAP2    | Ms, Sigma #M1406                          | -           | 1:250            | -                 |
| MAP2    | Ch, Abcam #ab5392                         | -           | 1:1000           | 1:1000            |
| MEF2A   | Rb, Santa Cruz Biotechnology #sc-17785    | -           | 1:1000           | -                 |
| NEFL    | Ms, Thermo Scientific #13-0700            | -           | 1:2000           | -                 |
| Nestin  | Ch, Online antibodies #ABIN187958         | -           | 1:100            | -                 |
| NEUN    | Ch, Millipore #ABN91                      | -           | 1:1000           | -                 |
| NPTX2   | Rb, Proteintech #10889-1-AP               | -           | 1:200            | 1:100             |
| NUMA    | Rb, Bethyl #A301-510A                     | -           | 1:200            | -                 |
| PLZF    | Rb, Santa Cruz Biotechnology #sc22839     | -           | 1:200            | -                 |
| PSD-95  | Ms, Abcam #ab2723-100                     | 1:2000      | -                | -                 |
| SNAP-25 | Ms, #SMI81                                | 1:1000      | 1:500            | -                 |
| SOD1    | Rb, Enzo #ADI-SOD-100                     | 1:15000     | -                | -                 |
| SOX2    | Gt, Santa Cruz Biotechnology #sc17320     | -           | 1:250            | -                 |
| STMN2   | Ms, Proteintech #67204-1-Ig               | -           | 1:100            | -                 |
| STMN2   | Rb, Proteintech #10586-1-AP               | -           | 1:200            | -                 |

|                            |                                       |        |        |       |
|----------------------------|---------------------------------------|--------|--------|-------|
| SYP                        | Rb, Santa Cruz Biotechnology #sc-9116 | 1:500  | 1:200  | -     |
| Tau <sup>p202/205</sup>    | Ms, ThermoFisher #MN1020              | -      | -      | 1:600 |
| TDP-43 <sup>p403/404</sup> | Ms/Hu, custom-made                    | -      | 1:500  | 1:500 |
| TDP-43 <sup>p403/404</sup> | Hu, custom-made                       | -      | -      | 1:500 |
| VIM                        | Ch, Millipore #AB5733                 | -      | 1:2000 | -     |
| ZO1                        | Rb, Millipore #AB2272                 | -      | 1:500  | -     |
| β-ACTIN                    | Ms, Sigma #A5441                      | 1:5000 | -      | -     |
| TDP-43 FL                  | Rb, Proteintech #18280-1-AP           | 1:1000 | -      | -     |
| TDP-43 3H8                 | Ms, Novus #NBP1-92695                 | 1:1000 | -      | -     |

### Secondary antibodies

| Name                    | Source                                  | WB dilution | Cell IF dilution | Brain IF dilution |
|-------------------------|-----------------------------------------|-------------|------------------|-------------------|
| Donkey anti-Ch 488      | Jackson Immuno Research #JAC703-546-155 | -           | 1:500            | -                 |
| Donkey anti-Ch 568      | Jackson Immuno Research #JAC703-586-155 | -           | 1:500            | -                 |
| Donkey anti-Ch 647      | Jackson Immuno Research #JAC703-606-155 | -           | 1:500            | -                 |
| Donkey anti-Gt 488      | ThermoFisher #A11055                    | -           | 1:500            | -                 |
| Donkey anti-Gt 594      | ThermoFisher #A11058                    | -           | 1:500            | -                 |
| Donkey anti-Gt 647      | ThermoFisher #A21447                    | -           | 1:500            | -                 |
| Donkey anti-Ms 488      | ThermoFisher #A21202                    | -           | 1:500            | -                 |
| Goat anti-Ms 555 PLUS   | ThermoFisher #A48287                    | -           | -                | 1:400             |
| Donkey anti-Ms 568      | ThermoFisher #A10037                    | -           | 1:500            | 1:400             |
| Donkey anti-Ms 647      | ThermoFisher #A31571                    | -           | 1:500            | -                 |
| Donkey anti-Rb 488      | ThermoFisher #A21206                    | -           | 1:500            | 1:400             |
| Donkey anti-Rb 488 PLUS | ThermoFisher #A32790                    | -           | -                | 1:400             |
| Donkey anti-Rb 568      | ThermoFisher #A10042                    | -           | 1:500            | -                 |
| Donkey anti-Rb 647      | ThermoFisher #A31573                    | -           | 1:500            | -                 |
| Goat anti-Ch            | ThermoFisher #A21449                    | -           | 1:500            | 1:400             |

|                          |                                         |         |   |       |
|--------------------------|-----------------------------------------|---------|---|-------|
| 647                      |                                         |         |   |       |
| Goat anti-Ch<br>647 PLUS | ThermoFisher #A32933                    | -       | - | 1:400 |
| Goat anti-Ms-<br>HRP     | Jackson Immuno Research<br>#115-035-146 | 1:5000  | - | -     |
| Goat anti-Rb-<br>HRP     | Jackson Immuno Research<br>#115-035-144 | 1:10000 | - | -     |

*Ch* chicken, *Gt* goat, *HRP* horseradish peroxidase, *IF* immunofluorescence, *Ms* mouse, *Rb* rabbit,  
*WB* Western blot

### Supplementary Table 11 Primer and shRNA hairpin sequences

|                                                            |
|------------------------------------------------------------|
| <b>shNPTX2a_F primer</b>                                   |
| 5'-TGCTTAAAGGCGCTATTGCCTCTTTTTTTAATTAACATGGTCCCAGC-3'.     |
| <b>shNPTX2a_R primer</b>                                   |
| 5'-AGCACAGCTTAAAGGCGCTATTGCCTCAAGCTTTCGTCCTTTCCAC-3'.      |
| <b>shNPTX2a hairpin</b>                                    |
| 5'-GAGGCAATAGCGCCTTTAAGCTGTGCTTGCTTAAAGGCGCTATTGCCTCTT-3'. |
| <b>shNPTX2b_F primer</b>                                   |
| 5'-TGCTGGCCTCGCGCTGCGCGCCTTTTTTTAATTAACATGGTCCCAGC-3.      |
| <b>shNPTX2b_R primer</b>                                   |
| 5'-AGCACAGCTGGCCTCGCGCTGCGGCCAAGCTTTCGTCCTTTCCAC-3'.       |
| <b>shNPTX2b hairpin</b>                                    |
| 5'-GGCGCGCAGCGCGAGGCCAGCTGTGCTTGCTGGCCTCGCGCTGCGCGCCTT-3'. |

**shNPTX2c\_F primer**

5'-TGCTAAATTACTACTCCCGTCCTTTTTTTAATTAACATGGTCCCAGC-3'.

**shNPTX2c\_R primer**

5'-AGCACAGCTAAATTACTACTCCCGTCCAAGCTTTCGTCCTTTCCAC-3'.

**shNPTX2c hairpin**

5'-GGACGGGAGTAGTAATTTAGCTGTGCTTGCTAAATTACTACTCCCGTCCTT-3'.

**shNPTX2d\_F primer**

5'-TGCTAATGCCATAGCTAGTGATTTTTTTTTAATTAACATGGTCCCAGC-3'.

**shNPTX2d\_R primer**

5'-AGCACAGCTAATGCCATAGCTAGTGATAAGCTTTCGTCCTTTCCAC-3'.

**shNPTX2d hairpin**

5'-ATCACTAGCTATGGCATTAGCTGTGCTTGCTAATGCCATAGCTAGTGATTT-3'.

**shTDP-43b\_F primer**

5'-TTGCTTAGAATTAGGAAGTTTGCTTTTTTTAATTAACATGGTCCCAG-3'.

**shTDP-43b\_R primer**

5'-GCACAGCTTAGAATTAGGAAGTTTGCAAGCTTTCGTCTTTCCAC-3'.

**shTDP-43b hairpin**

5'-GCAAACCTCCTAATTCTAAGCTGTGCTTGCTTAGAATTAGGAAGTTTGCTT-3'.

**shTDP-43c\_F primer**

5'-TTGCTAATGATCAAGTCCTCTCCTTTTTTTAATTAACATGGTCCCAG-3'.

**shTDP-43c\_R primer**

5'-GCACAGCTAATGATCAAGTCCTCTCCAAGCTTTCGTCTTTCCAC-3'.

**shTDP-43c hairpin**

5'-GGAGAGGACTTGATCATTAGCTGTGCTTGCTAATGATCAAGTCCTCTCCTT-3'.



**shHaloTag\_F primer**

5'-TGCTAAATGCAATACCTTTGACTTTTTTTAATTAACATGGTCCCAGC-3'.

**shHaloTag\_R primer**

5'-AGCACAGCTAAATGCAATACCTTTGACAAGCTTTCGTCCTTTCCAC-3'.

**shHaloTag hairpin**

5'-GTCAAAGGTATTGCATTTAGCTGTGCTTGCTAAATGCAATACCTTTGACTT-3'.

**shEGFP1\_F primer**

5'-GCTAGACGTTGTGGCTGTTGTTTTTTAATTAACATGGTCCCAGC-3'.

**shEGFP1\_R primer**

5'-AAGCACAGCTAGACGTTGTGGCTGTTGTAAGCTTTCGTCCTTTCCAC-3'.

**shEGFP1 hairpin**

5'-ACAACAGCCACAACGTCTAGCTGTGCTTGCTAGACGTTGTGGCTGTTGTTT-3'.

**shEGFP2\_F primer**

5'-GCTGATATAGACGTTGTGGCTTTTTTTTAATTAACATGGTCCCAGC-3'.

**shEGFP2\_R primer**

5'-AAGCACAGCTGATATAGACGTTGTGGCTAAGCTTTCGTCCTTTCCAC-3'.

**shEGFP2 hairpin**

5'-AGCCACAACGTCTATATCAGCTGTGCTTGCTGATATAGACGTTGTGGCTTT-3'.

**shHNRNPK\_F primer**

5'-TGCTTAAGCATTCCACAGCATCTTTTTTTAATTAACATGGTCCCAGC-3'.

**shHNRNPK\_R primer**

5'-AGCACAGCTTAAGCATTCCACAGCATCAAGCTTTCGTCCTTTCCAC-3'.

**shHNRNPK hairpin**

5'-GATGCTGTGGAATGCTTAAGCTGTGCTTGCTTAAGCATTCCACAGCATCTT-3'.

PCR primers for Q5 polymerase site-directed mutagenesis cloning of shRNAs into MHP\_shRNA cassette and resulting shRNA hairpin sequences
